# Supplementary material for: Reducing polyazomethine to poly(N-phenylbenzylamine) with near infrared electrochromic, fluorescence and photovoltaic properties
Source: Royal Society of Chemistry journal article supplement (doi:10.1039/c2py20846f), 2012-11-02
Supplement: c2py20846f.pdf [file c2py20846f.pdf]

## Supporting Information

### Reducing Polyazomethine to Poly(N-phenylbenzylamine) with Near Infrared Electrochromic, Fluorescence and Photovoltaic Properties

Jiwei Cai<sup>a</sup>, Ping Zhao<sup>b</sup>, Haijun Niu<sup>a\*</sup>, Yongfu Lian<sup>a</sup>, Cheng Wang<sup>a</sup>, Xuduo Bai<sup>a\*</sup>,

Wen Wang<sup>c</sup>

<sup>a</sup> Key Laboratory of Functional Inorganic Material Chemistry, Ministry of Education, Department of Macromolecular Science and Engineering, Heilongjiang University, Harbin 150086, P R China

<sup>b</sup> School of Material Science and Engineering, Harbin Institute of Technology, Harbin 150080, P R China

\* Corresponding author: Tel: 086-13684501571; Fax: 086-0451-86608131; email:

[haijunniu@hotmail.com](mailto:haijunniu@hotmail.com)

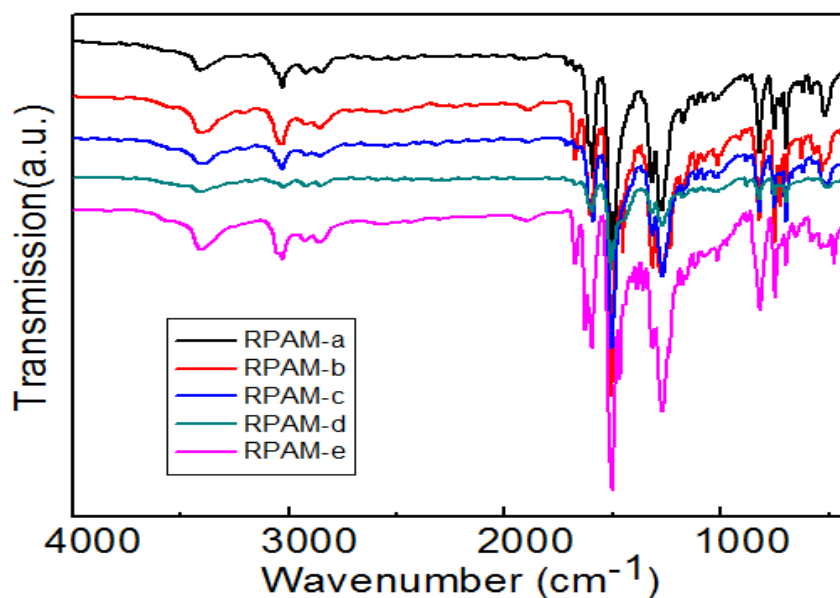

Fig.S1 IR spectra of RPAM-a-RPAM-e

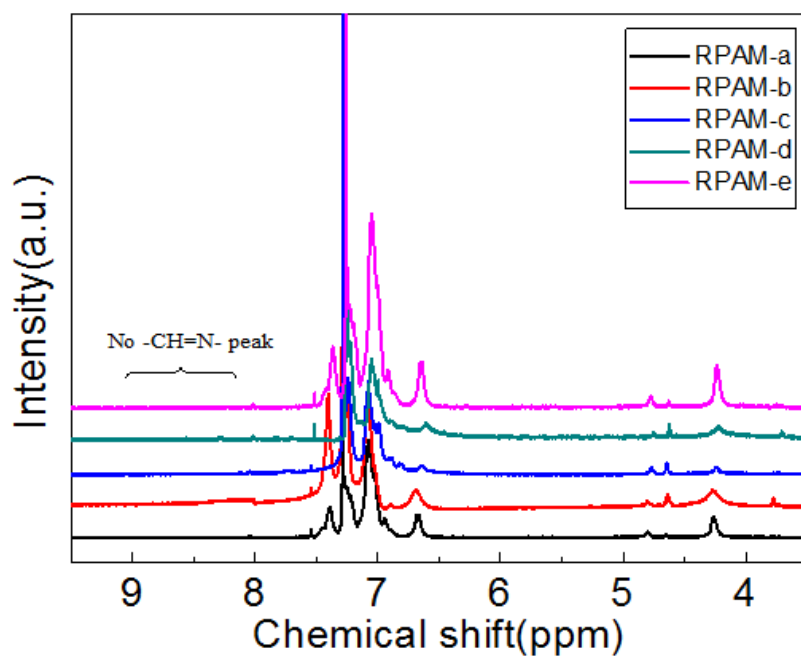

Fig. S2 <sup>1</sup>H NMR spectra of RPAM-a – RPAM-e

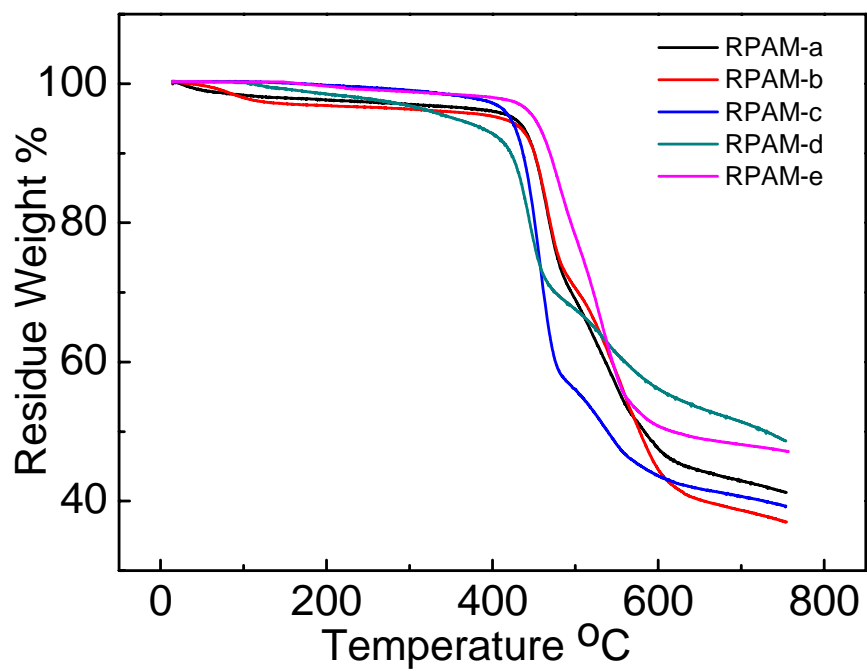

Fig. S3 TG diagrams of RPAM-a to RPAM-e

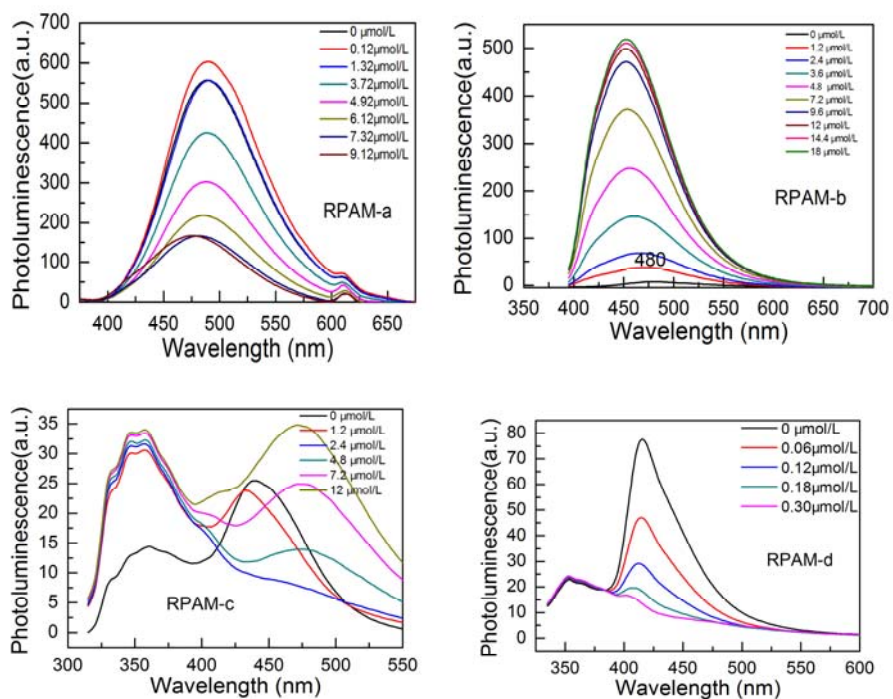

**Fig.S4** Changes of PL intensity of RPAM-a - RPAM-d in THF before and after addition of TFA in THF. ( The inset describes the PL dependence of the concentration of TFA)

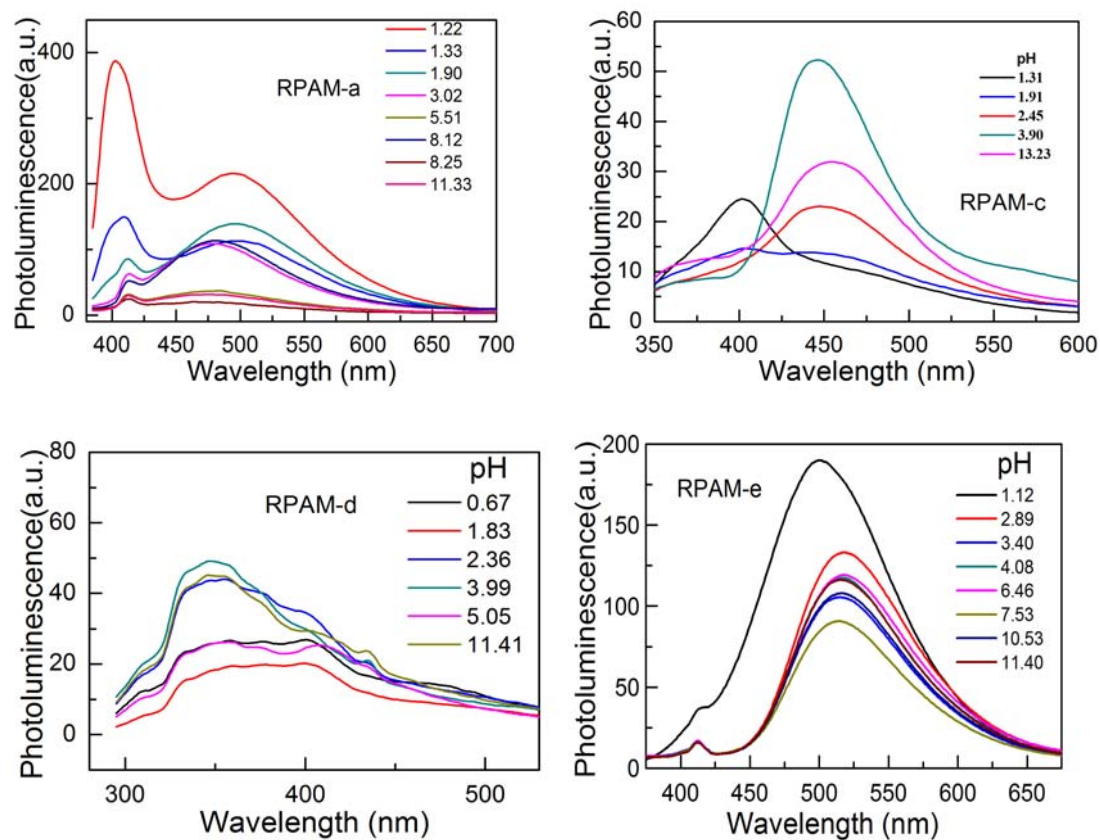

**Fig.S5** PL spectra of RPAM-b (concentration:  $1.0 \times 10^{-5} \text{ mol L}^{-1}$  C-N bonds ) on addition of various concentrations of proton in the mixed solvent (THF/H<sub>2</sub>O 1:1 v/v ).

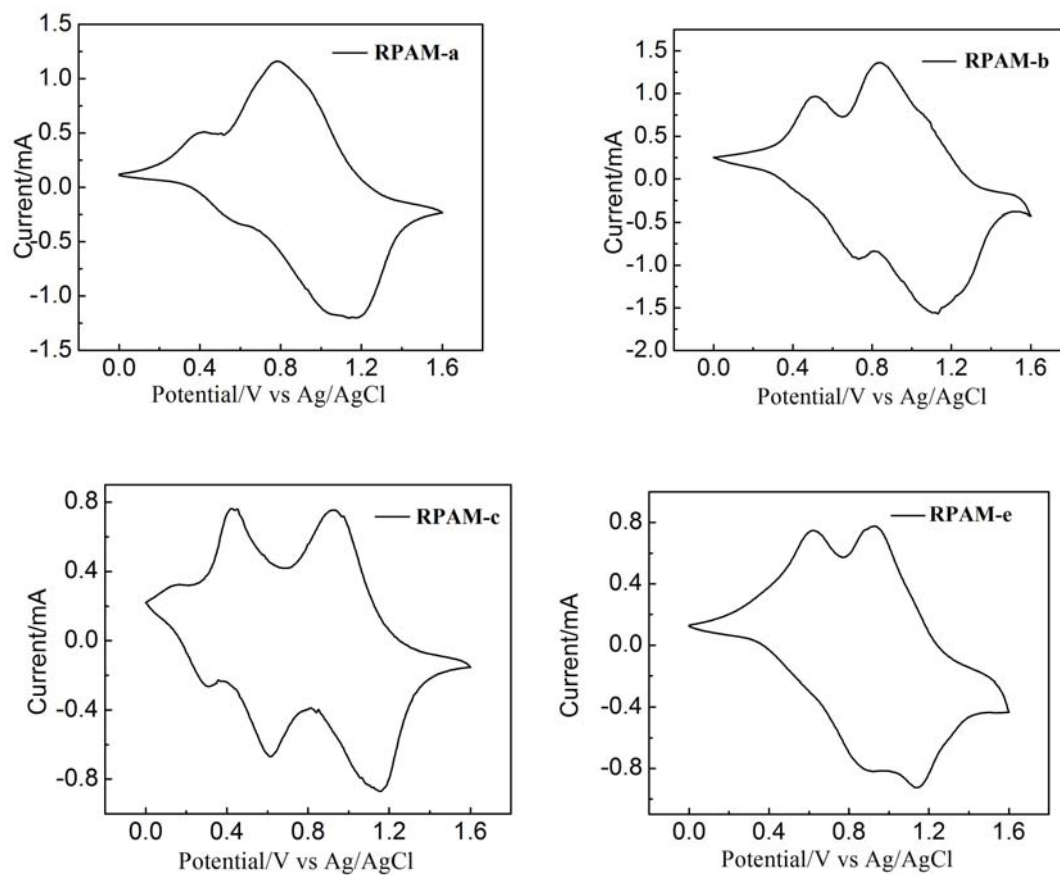

**Fig.S6** Repetitive CV scanning of the RPAM-a, RPAM-b, RPAM-c, RPAM-e film on the ITO/glass electrode in 0.1 M LiClO<sub>4</sub>/MeCN solution over the potential range from 0 to 1.6 V at a scan rate of 50 mV/s

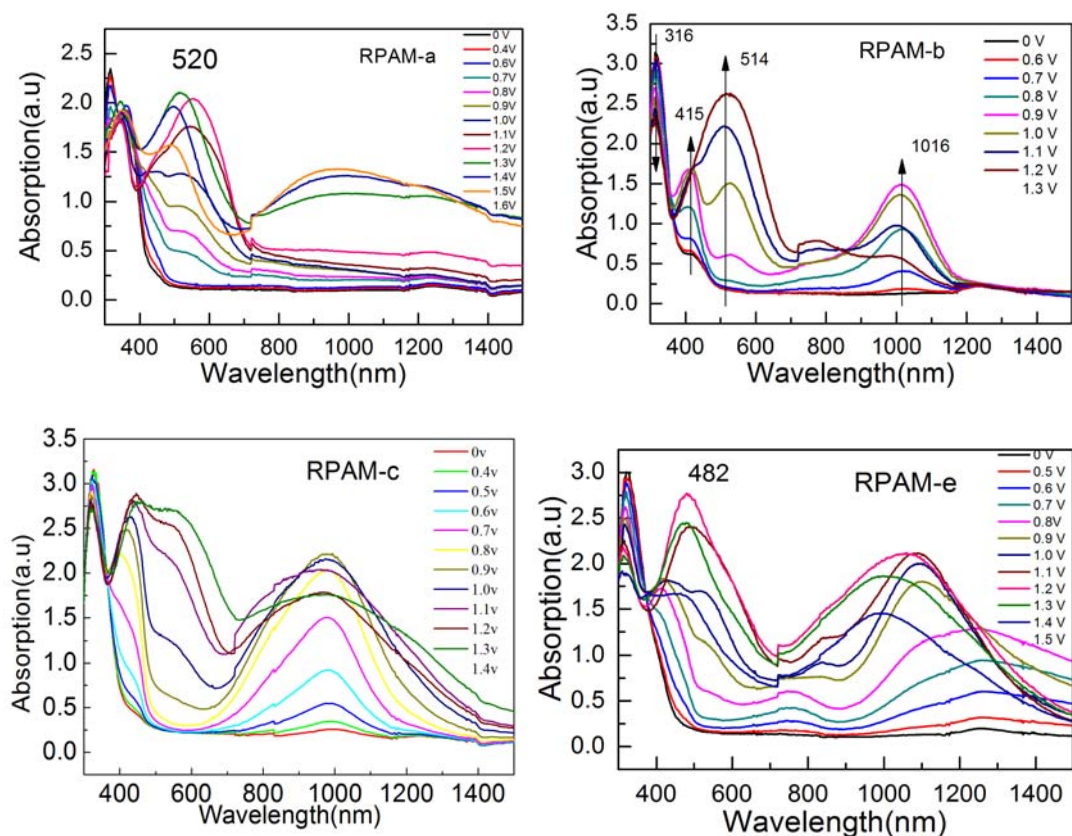

**Fig.S7** Electrochromic behavior of RPAM-a, RPAM-b, RPAM-c, RPAM-e thin film (in  $\text{CH}_3\text{CN}$  with 0.1 M  $\text{LiClO}_4$  as the supporting Electrolyte) 0.0-1.6(V vs. Ag/AgCl)

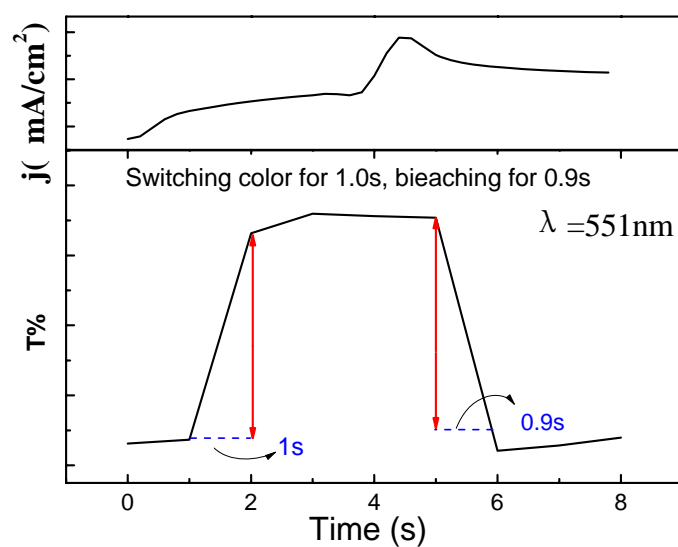

**Fig. S8** Dynamic changes of the transmittance and current upon switching the potential between -0.2 and 1.0 V (vs. Ag/ AgCl) with a pulse width of 8 s applied to the cast film of polymer RPAM-d on the ITO-coated glass slide in MeCN containing 0.1 mol  $\text{L}^{-1}$   $\text{LiClO}_4$ . The absorption was recorded at 551 nm.

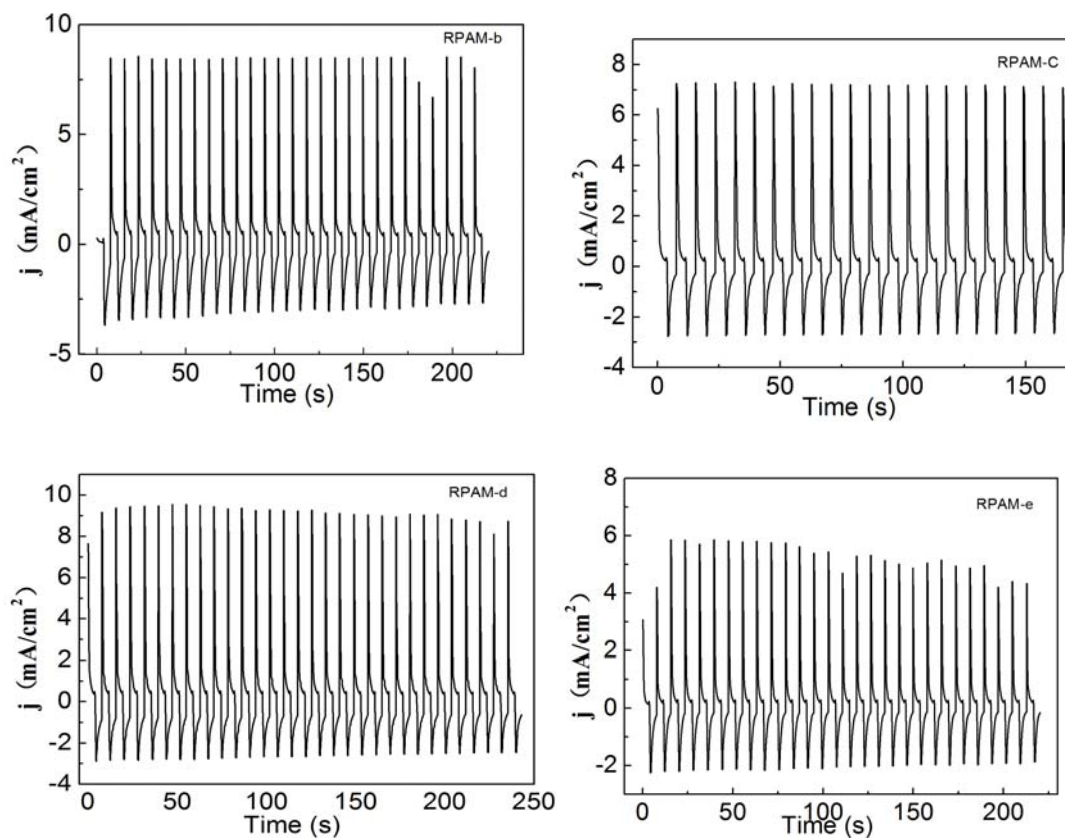

**Fig.S9** Current consumption between -0.2 and 1.0 V (vs. Ag/AgCl) of polymer RPAM-b, RPAM-c, RPAM-d, RPAM-e thin film on the ITO-coated glass substrate in a 0.1 mol l<sup>-1</sup> LiClO<sub>4</sub>/CH<sub>3</sub>CN solution with a cycle time of 8 s.



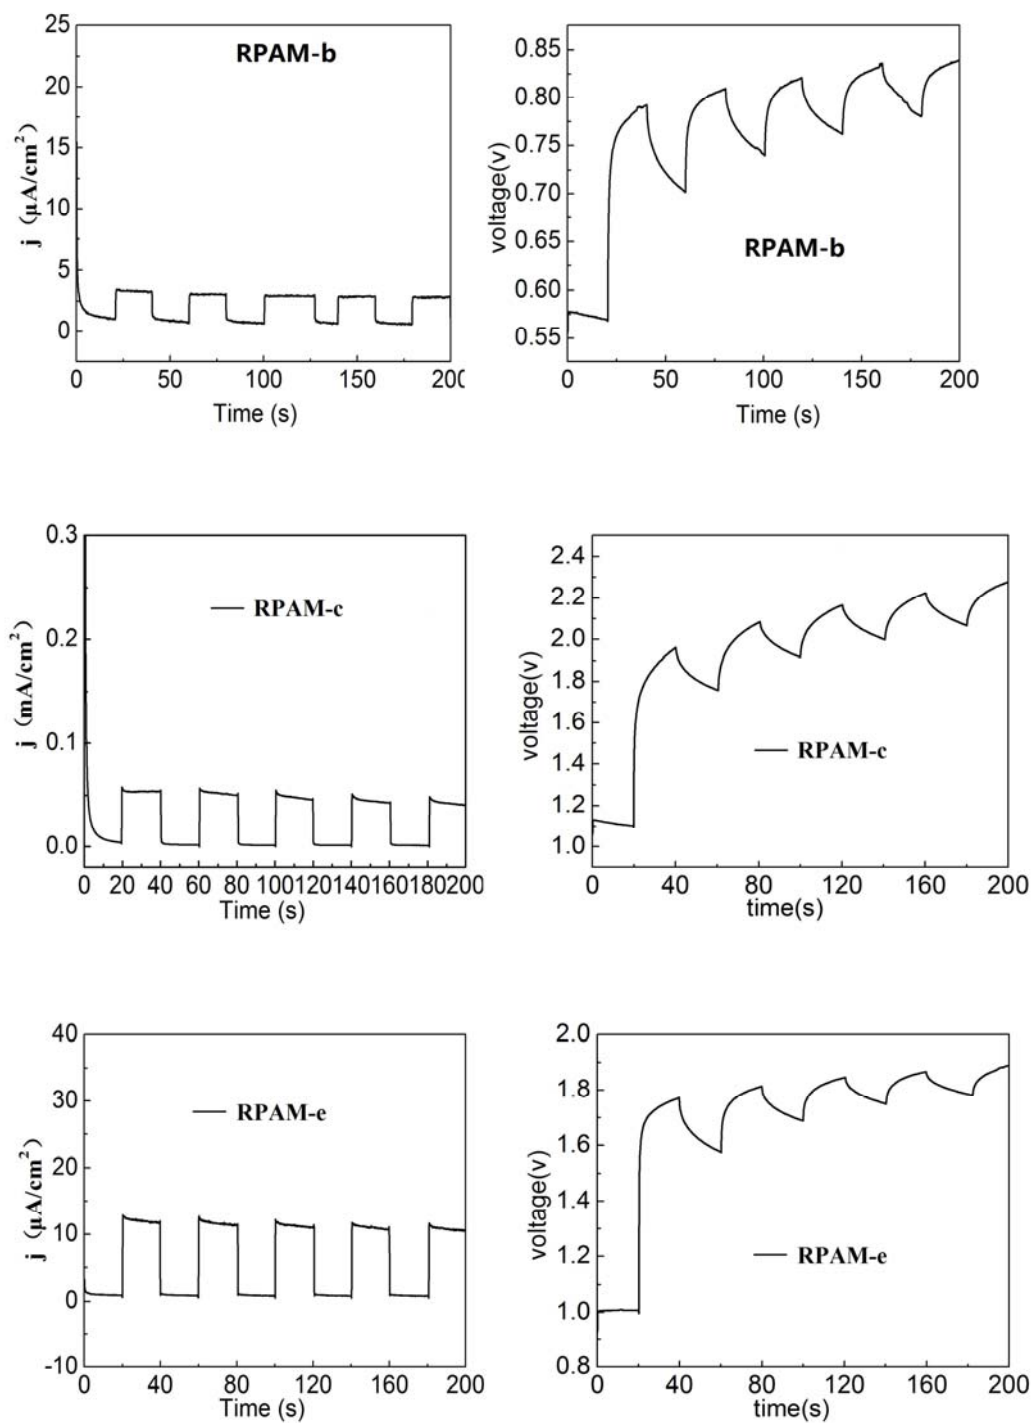

**Fig.S10** A typical photocurrent and photovoltaic response for an RPAM-b ,RPAM-c, RPAM-e immobilized ITO glass upon exposure to on/off light at room temperature.
